# Supplementary material
Source: Springer Nature journal article supplement (https://www.springermedizin.de/resource/supplementary/12990_2010_327_MOESM4_ESM.pdf/9613040)

**A**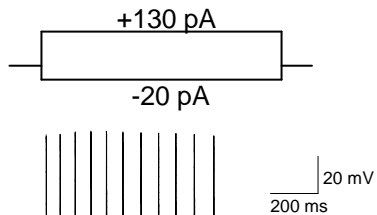**AQP-1<sup>+/+</sup>**

-56.5 mV

**AQP-1<sup>-/-</sup>**

-57.2 mV

**B**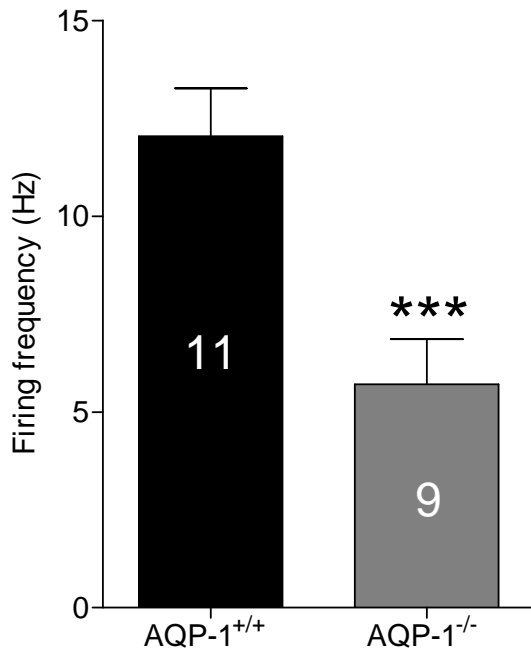

Supplement: MOESM4 [file 9613040]
